# Supplementary material
Source: PubMed Central journal article supplement (PMC7571843)
Supplement: atv-40-2764-s002.pdf [file atv-40-2764-s002.pdf]

## SUPPLEMENTAL MATERIAL

MS#: ATVB/2020/314845R1

### **COVID-19 in the Healthy Patient Population: Demographic and Clinical Phenotypic Characterization and Predictors of In-Hospital Outcomes**

Diana Maria Ronderos Botero , MD (1)\*, Alaa Mabrouk Salem Omar, MD, MSc, PhD (1,2,3)\*, Haozhe Keith Sun, MD (1), Nikhitha Mantri, MD (1), Ked Fortuzi, MD (1), Yongsub Choi, MD (1), Muhammad Adrish, MD (1,2), Marin Nicu, MD (1,2), Jonathan N Bella, MD (1,2), Sridhar Chilimuri, MD (1,2).

\* Both authors contributed equally

Author affiliation:

(1) Department of Internal Medicine, BronxCare Health System, Bronx, NY, USA

(2) Icahn School of Medicine at Mount Sinai, New York, NY, USA

(3) Department of Cardiovascular Medicine, Mount Sinai Saint Luke's Hospital, New York, NY, USA

**Supplementary table 1:** Demographic, Clinical, and laboratory characterization of all patients admitted with COVID-19 during the study period

|                                                    | <b>All patients<br/>(n=1207)</b> |
|----------------------------------------------------|----------------------------------|
| Age, years                                         | 61.9±15.7                        |
| Gender (females), n(%)                             | 470(39)                          |
| Body mass index, kg/m <sup>2</sup>                 | 30±7.2                           |
| Hypertension, n(%)                                 | 734(61)                          |
| Diabetes mellitus, n(%)                            | 549(45)                          |
| Smoking, n(%)                                      | 306(25)                          |
| Human immunodeficiency virus infection, n(%)       | 79(7)                            |
| Asthma, n(%)                                       | 154(13)                          |
| Chronic obstructive pulmonary disease, n(%)        | 119(10)                          |
| Chronic liver disease, n(%)                        | 7 (0.5)                          |
| Hepatitis B virus infection, n(%)                  | 4(0.3)                           |
| Hepatitis C virus infection, n(%)                  | 50(4)                            |
| Congestive heart failure, n(%)                     | 117(10)                          |
| Coronary artery disease, n(%)                      | 125(10)                          |
| Chronic kidney disease, n(%)                       | 98(8)                            |
| End stage renal disease, n(%)                      | 82(7)                            |
| Fever, n(%)                                        | 784(65)                          |
| Cough , n(%)                                       | 795(66)                          |
| Shortness of breath, n(%)                          | 827(69)                          |
| Myalgia , n(%)                                     | 363(30)                          |
| Chest discomfort, n(%)                             | 149(12)                          |
| Atypical Symptoms, n(%)                            | 411(34)                          |
| Time from symptoms to hospital presentation , days | 5.8±5.5                          |
| Length of hospital stay, days                      | 8±7                              |
| Hemoglobin (g/dL)                                  | 13±2.2                           |
| Platelets, (10 <sup>3</sup> /uL)                   | 220.8±102.6                      |
| White cell count (10 <sup>3</sup> /uL)             | 8.6±6.9                          |
| Neutrophils (10 <sup>3</sup> /uL)                  | 6.8±4                            |
| Lymphocytes (10 <sup>3</sup> /uL)                  | 1.24±5.3                         |
| D-Dimer (ng/ml)                                    | 3080±9847                        |
| Lactate dehydrogenase (units/L)                    | 582±393                          |
| High sensitivity C-reactive protein (mg/L)         | 142±112                          |
| Ferritin (mg/ml)                                   | 1153±11597                       |
| Lactate (mmol/L)                                   | 2.3±1.9                          |
| PT (seconds)                                       | 14±10.5                          |
| PTT (seconds)                                      | 32.2±7.8                         |
| Cratinin (mg/dL)                                   | 1.96±2.6                         |
| Alanine aminotransferase (units/L)                 | 44.±69                           |
| Aspartate aminotransferase (units/L)               | 71.1±115                         |
| Alkaline phosphatase (units/L)                     | 95±89                            |
| Total bilirubin (g/dL)                             | 0.62±0.73                        |
| Combined bilirubin (g/dL)                          | 0.27±0.46                        |
| Total protein, (g/dL)                              | 7±0.8                            |
| Serum albumin, (g/dL)                              | 3.6±0.6                          |
| Pro-calcitonin, (ng/ml)                            | 2.6±10.2                         |
| Hydroxychloroquine, n (%)                          | 918(76)                          |
| Tocilizumab, n (%)                                 | 80(7)                            |
| Need for mechanical ventilation, n (%)             | 485(40)                          |
| Mortality, n (%)                                   | 418(35)                          |

**Supplementary table 2: Patients with abnormal laboratory values overall in in the subgroups**

|                                                        | <b>Normal range</b> | <b>All Patients (n=157)</b> | <b>Age≤55 (n=80)</b> | <b>Age&gt;55 (n=77)</b> | <b>p-value <math>\chi^2</math></b> |
|--------------------------------------------------------|---------------------|-----------------------------|----------------------|-------------------------|------------------------------------|
| <b>Hemoglobin (g/dL)</b>                               | (12-15)             | 52(33%)*                    | 26 (33%,)            | 26 (34% )               | 0.721                              |
| <b>Platelets, (103/uL)</b>                             | (150-450)           | 31(20%)**                   | 20 (25%,)            | 11 (14%)                | 0.292                              |
| <b>White cell count (103/uL)</b>                       | (4-10)              | 54(34%***                   | 26 (33%)             | 28 (36%)                | 0.343                              |
| <b>Neutrophils (103/uL)</b>                            | (1.5-8)             | 50(32%****                  | 25 (31%)             | 25 (32%)                | 0.260                              |
| <b>Lymphocytes (103/uL)</b>                            | (0.5-5)             | 34(22%,0.42±0.09)\$         | 13 (16%)             | 21 (27%)                | 0.042                              |
| <b>Prothrombin time (seconds)</b>                      | ≤13.5               | 56(36%, 15±1.4)             | 25 (31%)             | 31 (40%)                | 0.166                              |
| <b>Activated Partial thromboplastin time (seconds)</b> | ≤36                 | 22(14%, 41±7.2)             | 14 17(%)             | 8 (10%)                 | 0.365                              |
| <b>Creatinine (mg/dL)</b>                              | ≤1.1                | 49(31%, 1.52±0.7)           | 20(25%)              | 29 (38%)                | 0.037                              |
| <b>Alanine transaminase (units/L)</b>                  | ≤56                 | 39(25%, 102±48)             | 22 (28%)             | 17 (22%)                | 0.313                              |
| <b>Aspartate transaminase (units/L)</b>                | ≤40                 | 84 (54%, 85±61)             | 37 (46%)             | 47 (61%)                | 0.06                               |
| <b>Alkaline phosphatase (units/L)</b>                  | ≤140                | 14(9%, 228±159)             | 7 (9%)               | 7 (9%)                  | 0.976                              |

\*16 patients were anemic (10.6±1), and 36 patients had erythrocytosis (16.2±1.2)

\*\*27 patients had thrombocytopenia (116±30.8), and 4 patients had thrombocytosis (576±73, values were 523, 543, 554, 684)

\*\*\*43 patients had leukocytosis (13.3±3) and 11 patients had lymphopenia (3.1±0.7)

\*\*\*\*48 patients had neutrophilia (11.4±2.9), and 2 patients had neutropenia and the values were 0.5 and 1.4

\$ all patients had lymphopenia
